# Supplementary material for: Peptides of tetraspanin oncoprotein CD151 trigger active immunity against primary tumour and experimental lung metastasis
Source: PubMed Central journal article supplement — eBioMedicine. 2019 Oct 25;49:133–44. doi: 10.1016/j.ebiom.2019.10.025 (PMC6945203; doi:10.1016/j.ebiom.2019.10.025), 2019-10-25
Supplement: mmc2.pdf [file mmc2.pdf]

## Supplementary Fig. 1

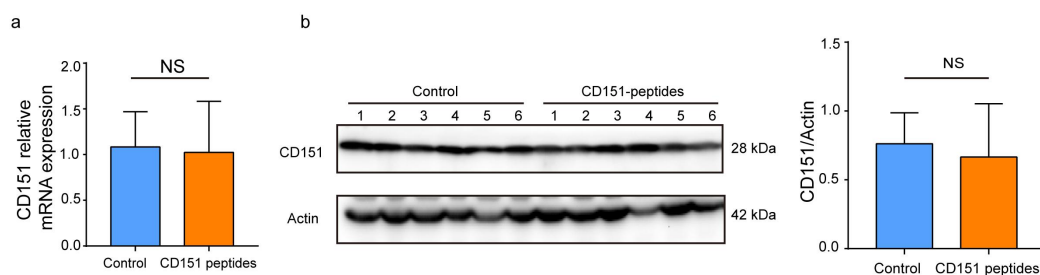

**Supplementary Fig. 1** CD151 expression on the tumour cells after peptide vaccination. **(a)** MRNA expression of CD151 on the tumor cells after peptide vaccination (n=6/group); **(b)** protein expression of CD151 on the tumor cells after peptide vaccination (n=6/group). Results are representative of two independent experiments. *P*-values were determined by two-tailed Student's t-test (NS, *P*>0.05).

## Supplementary Fig. 2

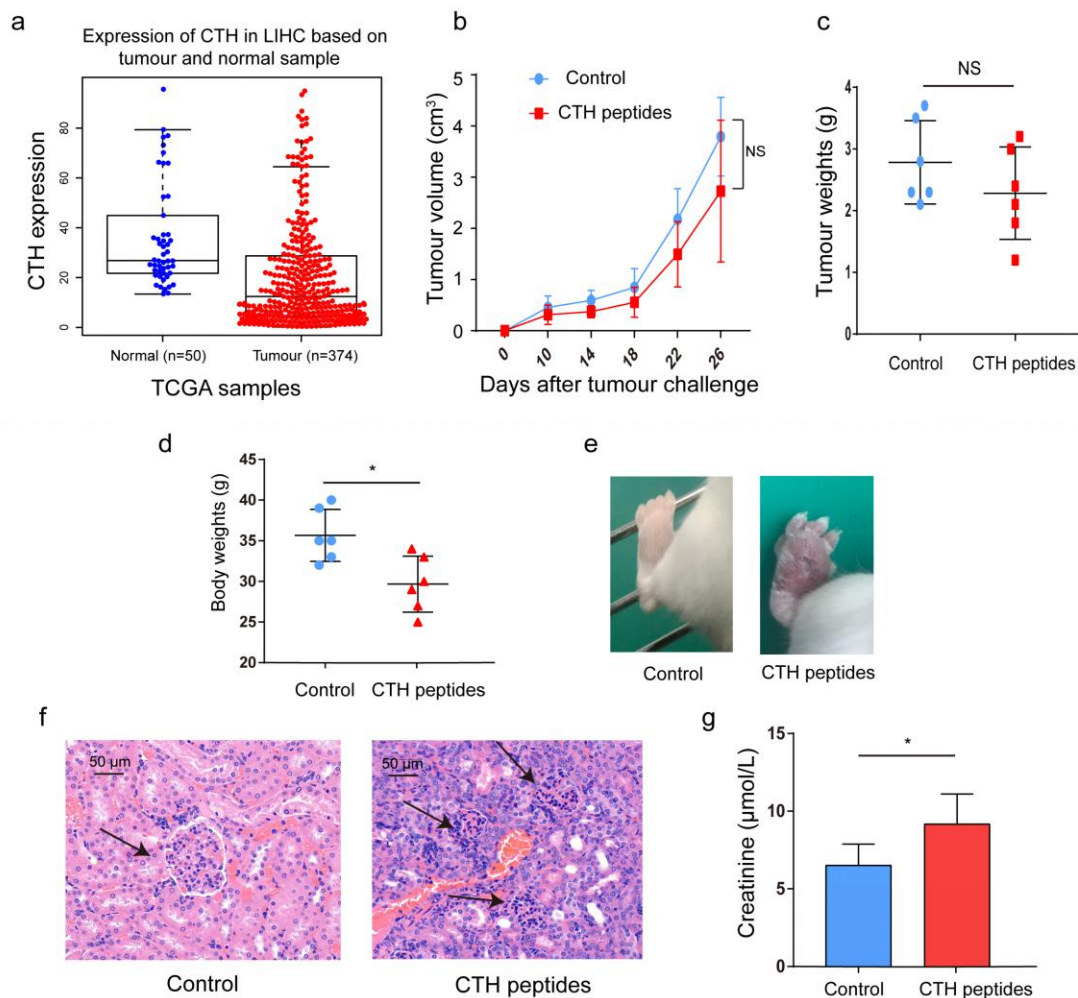

**Supplementary Fig. 2** The efficacy and side-effects of CTH peptides. **(a)** Expression of CTH in liver hepatocellular carcinoma (n=374) and normal tissue (n=50) were analysed by TCGA database. **(b)** Growth curve of H22 hepatoma in control and CTH

peptides immunisation groups (n=6/group). **(c)** Tumour weights. The side-effects of CTH peptides were evaluated by **(d)** mice body weights, **(e)** inflammation at injection site, **(f)** glomerular morphology by HE staining (glomeruloatrophy in CTH group as the arrow indicate), and **(g)** plasma creatinine. Results are representative of two independent experiments. *P*-values were determined by two-tailed Student's t-test (NS,  $P>0.05$ ; \*,  $P<0.05$ ).
